# Supplementary material for: Imaging gigahertz zero-group-velocity Lamb waves
Source: Springer Nature journal article supplement (doi:10.1038/s41467-019-10085-4), 2019-05-20
Supplement: 41467_2019_10085_MOESM2_ESM.pdf [file 41467_2019_10085_MOESM2_ESM.pdf]

## Description of Additional Supplementary Files

**File Name:** Supplementary Movie 1

**Description:** Imaging a ZGV Lamb mode. Normalized animations of the measured out-of-plane surface particle velocity at (a) 0.2391 and (b) 1.6900 GHz.
